# Supplementary material for: Acoustic and phonemic processing are impaired in individuals with aphasia
Source: PubMed Central journal article supplement (PMC10336064; doi:10.1038/s41598-023-37624-w), 2023-07-11
Supplement: 41598_2023_37624_MOESM2_ESM.pdf [file 41598_2023_37624_MOESM2_ESM.pdf]

846 **Recruitment flowchart**

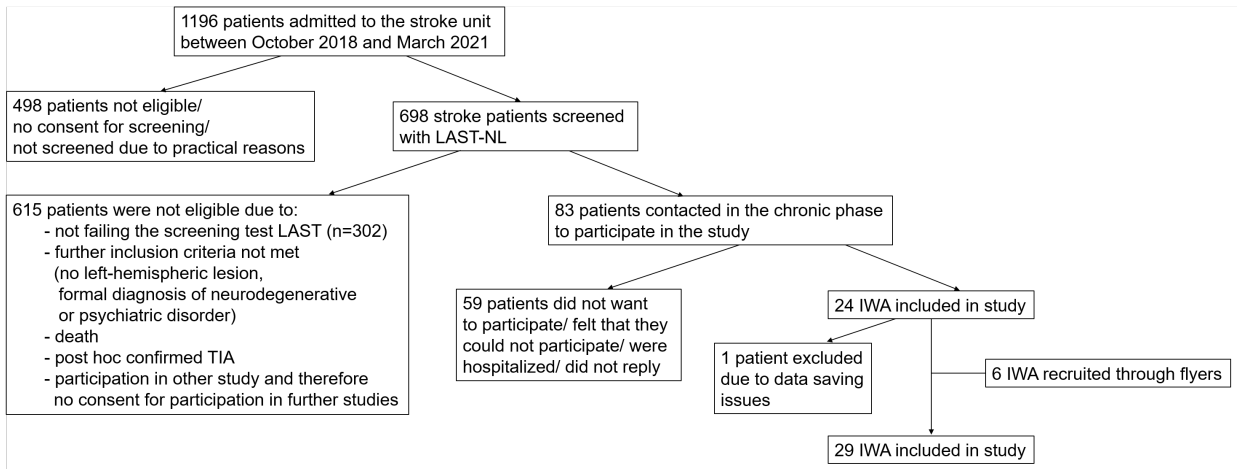

Figure S.1: Flowchart of the recruitment procedure of individuals with aphasia as described in section 2.1 of the paper.

847 **Visualization of demographic and diagnostic variables**

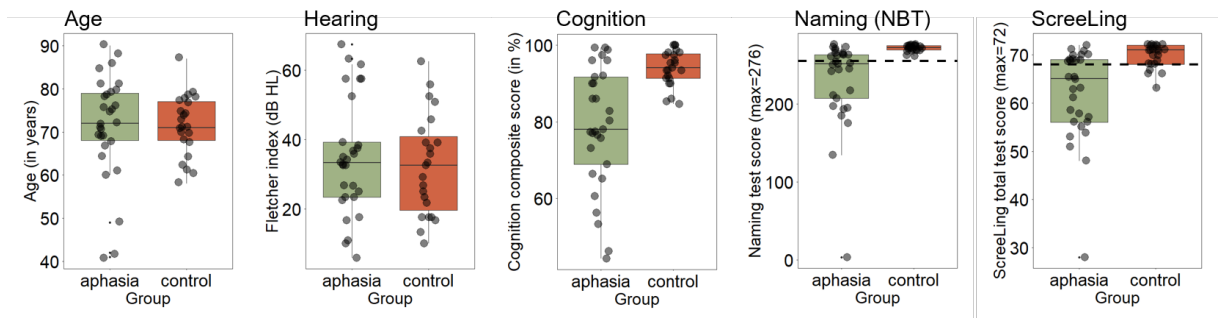

Figure S.2: This figure shows demographic and diagnostic variables by group of the variables age, hearing, cognition, naming test and diagnostic language test. The dashed lines on the two right most figures correspond to the cut-off threshold of those tests.

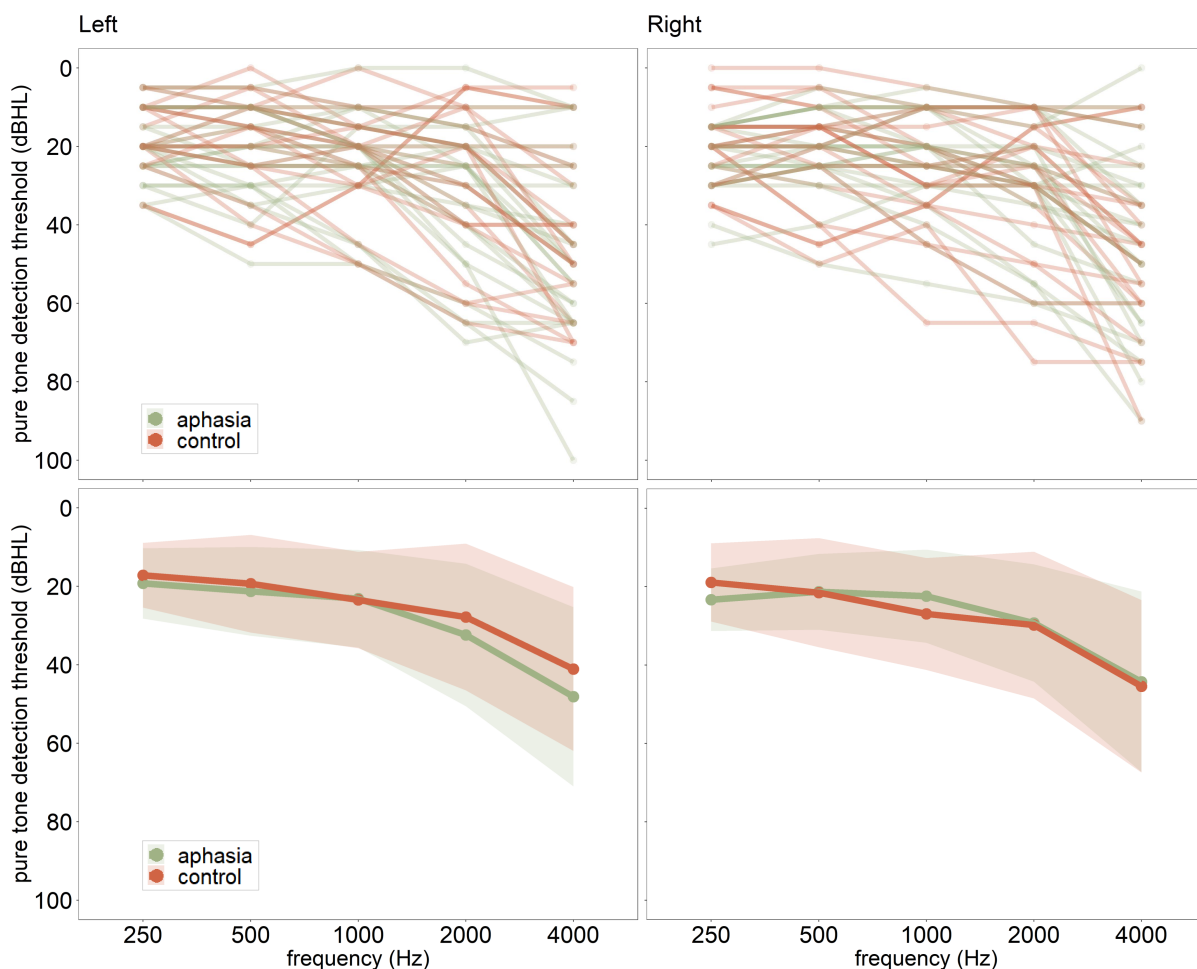

Figure S.3: **The pure tone audiograms by group.** The upper panels show individual pure tone detection thresholds for the left and the right ear respectively. The lower panels display the mean and standard deviation of pure tone detection thresholds by group for the left and the right ear respectively.

849 **Correlations between psychoacoustic tasks and cognition**

850 We report the within-aphasia group correlations between the psychoacoustic tasks and the cognitive  
 851 score.

- 852 • RTD task ~ cognition: Pearson's  $r = -0.43$ ;  $p = 0.039$  (The smaller the discrimination threshold at  
 853 the RTD task (i.e., the better the performance), the better the cognitive score.)
- 854 • Phoneme identification task ~ cognition: Pearson's  $r = 0.04$ ;  $p = 0.866$

855 **Education levels**

Table S.1: Contingency table for education levels per group.

| Education level<br>(years of education) | Aphasia group<br>n (%) | Control group<br>n (%) |
|-----------------------------------------|------------------------|------------------------|
| Primary school<br>(6 years)             | 2 (6.90%)              | 0 (0.00%)              |
| Secondary school<br>(12 years)          | 10 (34.48%)            | 5 (21.74%)             |
| College degree<br>(15 years)            | 8 (27.59%)             | 8 (34.78%)             |
| University degree<br>(17 years)         | 9 (31.03%)             | 8 (34.78%)             |
| Doctoral degree<br>(21 years)           | 0 (0.00%)              | 2 (8.70%)              |

856 **Normality assumptions of variables used for statistical analyses**

Table S.2: Shapiro-Wilk and Levene's test results to check the normality assumptions.

| Effect                                              | Test                                 | W-value | F-Value | DF    | p-value      |
|-----------------------------------------------------|--------------------------------------|---------|---------|-------|--------------|
| <b>Rise time discrimination task</b>                |                                      |         |         |       |              |
| Group comparison<br>without controlling             | Normality (Shapiro-Wilk test)        | 0.96    |         |       | 0.205        |
|                                                     | Homoscedasticity (Levene's test)     |         | 2.03    | 1, 44 | 0.160        |
| Group comparison<br>with controlling                | Normality (Shapiro-Wilk test)        | 0.97    |         |       | 0.332        |
| Phonology ScreeLing<br>(within aphasia group)       | Normality (Shapiro-Wilk test)        | 0.97    |         |       | 0.882        |
| Phonological word fluency<br>(within aphasia group) | Normality (Shapiro-Wilk test)        | 0.92    |         |       | 0.094        |
| <b>Phoneme identification task</b>                  |                                      |         |         |       |              |
| Group comparison<br>without controlling             | <b>Normality (Shapiro-Wilk test)</b> | 0.93    |         |       | <b>0.031</b> |
|                                                     | Homoscedasticity (Levene's test)     |         | 2.33    | 1, 35 | 0.135        |
| Group comparison<br>with controlling                | <b>Normality (Shapiro-Wilk test)</b> | 0.91    |         |       | <b>0.01</b>  |
| Phonology ScreeLing<br>(within aphasia group)       | Normality (Shapiro-Wilk test)        | 0.96    |         |       | 0.658        |
| Phonological word fluency<br>(within aphasia group) | Normality (Shapiro-Wilk test)        | 0.96    |         |       | 0.694        |

DF = degrees of freedom; significant effects are marked in bold, meaning that the data are not meeting the normality assumption.

857 **Individual deviance analysis**

858 The individual deviance analysis allows to see which individuals with aphasia are deviant from the control  
 859 group on the RTD task and the phoneme identification task (see paper for more details on the method).  
 860 For the RTD task, the control sample was normally distributed after removing the lowest performing 5%  
 861 ( $\geq$  percentile 95) of the control group (Shapiro-Wilk normality test:  $W = 0.92$ ,  $p\text{-value} = 0.122$ ). For the  
 862 phoneme identification task, the control sample was also normally distributed after removing the lowest  
 863 performing 5% ( $\leq$  percentile 5) of the control group (Shapiro-Wilk normality test:  $W = 0.95$ ,  $p\text{-value} =$   
 864  $0.517$ ). For the threshold estimation, all participant scores were standardized by subtracting the mean of  
 865 the trimmed control sample and then dividing by the SD of the trimmed control sample. The deviance  
 866 threshold was then defined at  $-1.65$  SD (for the phoneme identification task) or  $1.65$  SD (for the RTD  
 867 task) of the z-scored distribution.

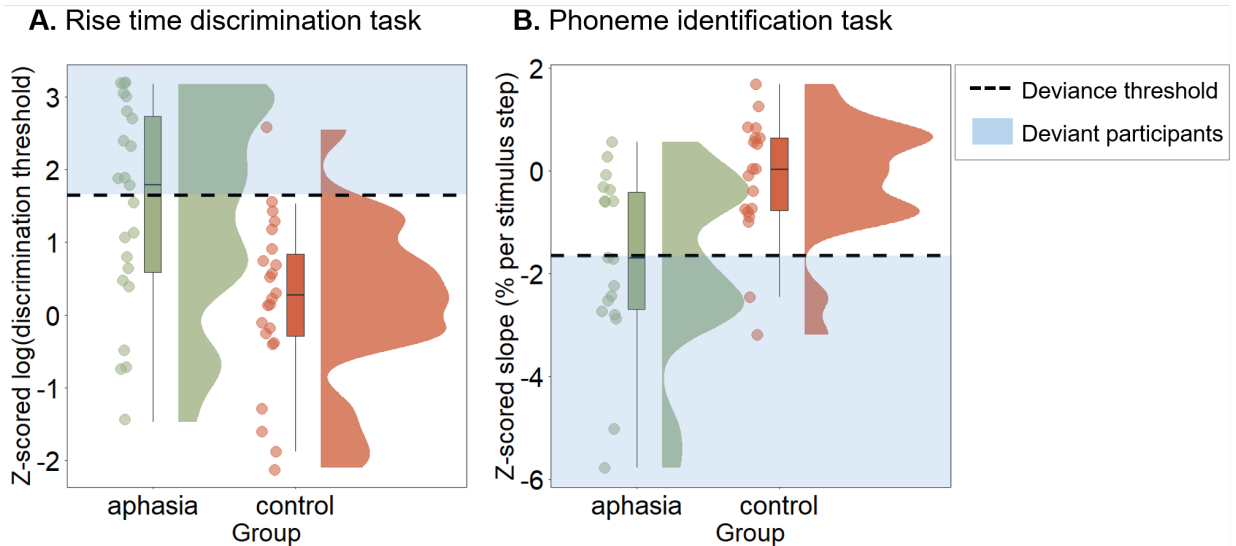

Figure S.4: **Individual deviance analysis of the acoustic and phonemic processing tasks.** **A.** Visualization of the deviant participants for the RTD task. **B.** Visualization of the deviant participants for the phoneme identification task.

Table S.3: Number of participants and percentage of deviance on the acoustic and phonemic tasks.

|                                                | <b>Aphasia group</b><br>n(%) | <b>Control group</b><br>n(%) |
|------------------------------------------------|------------------------------|------------------------------|
| <b>Rise time discrimination task</b>           |                              |                              |
| deviant                                        | 12 (52.17%)                  | 1 (4.35%)                    |
| not deviant                                    | 11 (47.83%)                  | 22 (95.65%)                  |
| <b>Phoneme identification task</b>             |                              |                              |
| deviant                                        | 10 (55.56%)                  | 2 (10.53%)                   |
| not deviant                                    | 8 (44.44%)                   | 17 (89.47%)                  |
| <b>Overlap in deviance between the 2 tasks</b> |                              |                              |
| overlap                                        | 6 (37.50%)                   | 17 (89.47%)                  |
| no overlap                                     | 10 (62.5%)                   | 2 (10.53%)                   |
| <b>Deviance on at least one of the 2 tasks</b> |                              |                              |
| yes                                            | 19 (76%)                     | 3 (13.04%)                   |
| no                                             | 6 (24%)                      | 20 (86.96%)                  |
